# Supplementary material for: Predicting substrates of the human breast cancer resistance protein using a support vector machine method
Source: PubMed Central journal article supplement (PMC3641962; doi:10.1186/1471-2105-14-130), 2013-04-15
Supplement: 1471-2105-14-130-S1.pdf [file 1471-2105-14-130-S1.pdf]

**Table S1. List of substrates and non-substrates of wild-type BCRP used in this study****Substrates of wild-type BCRP**

| <b>Compound</b>                                        | <b>Reference</b> | <b>Predicted property</b> | <b>data set</b> |
|--------------------------------------------------------|------------------|---------------------------|-----------------|
| 2-amino-3-methylimidazo[4,5-f] quinoline (IQ)          | [1]              | S                         | tr              |
| 2-chloro-2'-deoxyadenosine (Cladribine)                | [2, 3]           | S                         | tr              |
| 3,5-di-O-caffeoylquinic acid                           | [4]              | S                         | tr              |
| 3-amino-1,4-dimethyl-5H-pyrido[4,3-b] indole (Trp-P-1) | [1]              | S                         | tr              |
| 4-methylumbelliferone glucuronide                      | [5]              | S                         | tr              |
| 6-MP                                                   | [2]              | S                         | tr              |
| 7-ethyl-10-hydroxy-camptothecin (SN-38)                | [6]              | S                         | tr              |
| 7-hydroxy-methotrexate                                 | [7]              | S                         | tr              |
| 9-aminocamptothecin                                    | [8]              | S                         | tr              |
| A771726 (an active metabolite of leflunomide)          | [9]              | S                         | tr              |
| Acetaminophen glucuronide                              | [10]             | S                         | tr              |
| Acetaminophen sulfate                                  | [10]             | S                         | tr              |
| Acyclovir                                              | [11]             | S                         | tr              |
| AflatoxinB1                                            | [1]              | S                         | tr              |
| Axitinib                                               | [12]             | S                         | tr              |
| Azidopine                                              | [13]             | S                         | tr              |
| AZT5'-monophosphate                                    | [14, 15]         | S                         | tr              |
| Becatecarin (NSC655649)                                | [16]             | S                         | tr              |
| Bicalutamide                                           | [17]             | S                         | tr              |
| Biochanin A sulfate                                    | [18]             | S                         | tr              |
| Bisantrene                                             | [19]             | S                         | tr              |
| BN80915 (a difluoro derivative of homocamptothecin)    | [20]             | S                         | tr              |
| BODIPY-dihydropyridine                                 | [13]             | S                         | tr              |
| BODIPY-prazosin                                        | [21]             | S                         | tr              |
| BP-3-glucuronide                                       | [22]             | S                         | tr              |
| C-1310                                                 | [23]             | S                         | tr              |
| C-1336                                                 | [23]             | S                         | tr              |
| C-1584                                                 | [23]             | S                         | tr              |
| Canertinib (CI1033)                                    | [24]             | S                         | tr              |
| cGMP                                                   | [25]             | S                         | tr              |
| Chlorin e6 (Ce6)                                       | [26]             | S                         | tr              |
| Chlorothiazide                                         | [27]             | S                         | tr              |
| Ciprofloxacin                                          | [28]             | S                         | tr              |
| Clofarabine                                            | [2]              | S                         | tr              |
| Coumestrol                                             | [29]             | S                         | tr              |
| CP-671305                                              | [30]             | S                         | tr              |
| Daidzein sulfate                                       | [31]             | S                         | tr              |
| Dasatinib                                              | [32]             | S                         | tr              |

|                                      |          |   |    |
|--------------------------------------|----------|---|----|
| E3040-glucuronide                    | [5]      | S | tr |
| E3040-sulfate                        | [5]      | S | tr |
| Enrofloxacin                         | [33]     | S | tr |
| Estrone-3-sulfate (E <sub>1</sub> S) | [5, 34]  | S | tr |
| Etoposide                            | [35]     | S | tr |
| Furosemide                           | [35]     | S | tr |
| Ganciclovir                          | [36]     | S | tr |
| Genistein                            | [29, 37] | S | tr |
| Genistein sulfate                    | [31]     | S | tr |
| Gimatecan                            | [38]     | S | tr |
| Glutathione                          | [39]     | S | tr |
| Glyburide                            | [40]     | S | tr |
| GW1843                               | [41]     | S | tr |
| Harmol sulfate                       | [10]     | S | tr |
| Hoechst33342                         | [42]     | S | tr |
| Homocamptothecin                     | [20]     | S | tr |
| Imatinib mesylate (STI-571)          | [43]     | S | tr |
| Iodoarylazidoprazosin (IAAP)         | [13]     | S | tr |
| Irinotecan (CPT-11)                  | [44, 45] | S | tr |
| J-107088                             | [46]     | S | tr |
| JNJ-7706621                          | [47]     | S | tr |
| Kaempferol                           | [48]     | S | tr |
| Lamivudine (3TC)                     | [14, 15] | S | tr |
| Lapatinib                            | [49]     | S | tr |
| MelQx                                | [50]     | S | tr |
| Methotrexate-Glu <sub>2</sub>        | [51, 52] | S | tr |
| Methotrexate-Glu <sub>3</sub>        | [51, 52] | S | tr |
| Mitoxantrone                         | [19, 21] | S | tr |
| NB-506                               | [46]     | S | tr |
| N-desethyl sunitinib                 | [53]     | S | tr |
| NSC107392                            | [54]     | S | tr |
| NSC349156                            | [54]     | S | tr |
| NSC73306                             | [55]     | S | tr |
| Ofloxacin                            | [28]     | S | tr |
| Pantoprazole                         | [56]     | S | tr |
| Pemetrexed                           | [57]     | S | tr |
| PMEA                                 | [3]      | S | tr |
| Prazosin                             | [19]     | S | tr |
| Resveratrol-3-sulfate                | [58]     | S | tr |
| Riboflavin (VitaminB2)               | [59]     | S | tr |
| SN-355                               | [60]     | S | tr |
| Sorafenib                            | [61]     | S | tr |
| Sulfasalazine                        | [62]     | S | tr |
| Sunitinib                            | [63, 64] | S | tr |
| Taurocholic acid                     | [65]     | S | tr |

|                                         |          |    |    |
|-----------------------------------------|----------|----|----|
| Taurolithocholic acid-3-sulfate (TLC-S) | [5]      | S  | tr |
| Teniposide                              | [35]     | S  | tr |
| Topotecan                               | [19]     | S  | tr |
| Triamterene                             | [50]     | S  | tr |
| Uric acid (urate)                       | [66]     | S  | tr |
| Vemurafenib (PLX4032)                   | [67]     | S  | tr |
| Bupropion                               | [68]     | NS | tr |
| CdAMP                                   | [2]      | NS | tr |
| Cholic acid                             | [65]     | NS | tr |
| Cimetidine                              | [69]     | NS | tr |
| DHEAS                                   | [5]      | NS | tr |
| Docetaxel                               | [70]     | NS | tr |
| E <sub>2</sub> 17βG                     | [5, 71]  | NS | tr |
| Erythromycin                            | [35]     | NS | tr |
| Fluvastatin                             | [35]     | NS | tr |
| Moxidectin                              | [72]     | NS | tr |
| Pheophorbide a                          | [73]     | NS | tr |
| Phytoporphyrin                          | [74]     | NS | tr |
| Pravastatin                             | [75]     | NS | tr |
| Pyropheophorbide-amethylester (MMPa)    | [26]     | NS | tr |
| Temocapril                              | [76]     | NS | tr |
| Abacavir (ABC)                          | [77, 78] | S  | te |
| Albendazole sulfoxide                   | [79]     | S  | te |
| Atorvastatin                            | [80]     | S  | te |
| Belotecan                               | [81]     | S  | te |
| BODIPY-nilotinib                        | [82]     | S  | te |
| Cediranib                               | [83]     | S  | te |
| Cholylglycylamido fluorescein           | [65]     | S  | te |
| d-Luciferin                             | [84]     | S  | te |
| Edaravone sulfate                       | [85]     | S  | te |
| Erlotinib                               | [86]     | S  | te |
| Grepafloxacin                           | [87]     | S  | te |
| GV196771                                | [88]     | S  | te |
| Harmol glucuronide                      | [10]     | S  | te |
| Leflunomide                             | [9]      | S  | te |
| ME3277                                  | [89]     | S  | te |
| Nitrofurantoin                          | [90]     | S  | te |
| Norfloxacin                             | [28]     | S  | te |
| Olmesartan medoxomil                    | [91]     | S  | te |
| Plumbagin                               | [92]     | S  | te |
| PNU-288034                              | [93]     | S  | te |
| Protoporphyrin IX                       | [94]     | S  | te |
| Quercetin                               | [48]     | S  | te |
| Resveratrol                             | [7]      | S  | te |
| Resveratrol-3-glucuronide               | [58]     | S  | te |

|                                                       |           |    |    |
|-------------------------------------------------------|-----------|----|----|
| Rosiglitazone                                         | [95]      | S  | te |
| Rosuvastatin                                          | [35]      | S  | te |
| SN-398                                                | [60]      | S  | te |
| Tandutinib                                            | [96]      | S  | te |
| Tomudex                                               | [41]      | S  | te |
| Vandetanib                                            | [97]      | S  | te |
| Vitamin K3                                            | [92]      | S  | te |
| Butyrate                                              | [98]      | NS | te |
| Cerivastatin                                          | [75]      | NS | te |
| Glycocholic acid                                      | [65]      | NS | te |
| Troglitazone sulfate                                  | [99]      | NS | te |
| 2-amnio-1-methyl-6-phenylimidazo(4,5-b)pyridine(PhIP) | [100]     | S  | e  |
| Apigenin glucuronide                                  | [101]     | S  | e  |
| Befloxatone                                           | [102]     | S  | e  |
| Benzo[a]pyrene-3-sulfate (BP-3-sulfate)               | [22]      | S  | e  |
| CP-724714                                             | [103]     | S  | e  |
| Daidzen glucuronide                                   | [31]      | S  | e  |
| Dantrolene                                            | [50]      | S  | e  |
| Diclofenac                                            | [104]     | S  | e  |
| Dipyridamole                                          | [105]     | S  | e  |
| Gefitinib                                             | [86]      | S  | e  |
| Genistein glucuronide                                 | [31, 101] | S  | e  |
| Indolocarbazole                                       | [106]     | S  | e  |
| Oxfendazole (fenbandazole-sulfoxide)                  | [79]      | S  | e  |
| Pitavastatin                                          | [107]     | S  | e  |
| Puromycin                                             | [3]       | S  | e  |
| Riluzole                                              | [108]     | S  | e  |
| ST1968                                                | [109]     | S  | e  |
| Symadex (C-1311)                                      | [23]      | S  | e  |
| Ulifloxacin                                           | [87]      | S  | e  |
| 17 $\beta$ -estradiol sulfate                         | [34]      | NS | e  |
| 5-aminolevulinic acid                                 | [26]      | NS | e  |
| NSC265473                                             | [54]      | NS | e  |
| Phenethyl isothiocyanate (PEITC)                      | [110]     | NS | e  |
| Sphingosine 1-phosphate                               | [111]     | NS | e  |
| TH-337                                                | [112]     | NS | e  |

#### Non-substrates of wild-type BCRP

| Compound             | Reference | Predicted property | Data set |
|----------------------|-----------|--------------------|----------|
| (99m) Tc-Tetrofosmin | [113]     | NS                 | tr       |
| Aclarubicin          | [114]     | NS                 | tr       |

|                              |       |    |    |
|------------------------------|-------|----|----|
| Aldosterone                  | [69]  | NS | tr |
| amino BPU                    | [115] | NS | tr |
| Bisoprolol                   | [95]  | NS | tr |
| C1315                        | [23]  | NS | tr |
| C1379                        | [23]  | NS | tr |
| C1554                        | [23]  | NS | tr |
| Calcein                      | [19]  | NS | tr |
| Calcein-AM                   | [19]  | NS | tr |
| Cisplatinum                  | [116] | NS | tr |
| Curcumin                     | [117] | NS | tr |
| Cyclosporin A                | [118] | NS | tr |
| Dexamethasone                | [69]  | NS | tr |
| Digoxin                      | [69]  | NS | tr |
| Doxorubicin                  | [114] | NS | tr |
| Edaravone glucuronide        | [85]  | NS | tr |
| Epirubicin                   | [114] | NS | tr |
| Estrone                      | [34]  | NS | tr |
| Indinavir                    | [119] | NS | tr |
| Ixabepilone                  | [70]  | NS | tr |
| Metoprolol                   | [95]  | NS | tr |
| Nelfinavir                   | [120] | NS | tr |
| Nivalenol                    | [121] | NS | tr |
| Norbuprenorphine             | [122] | NS | tr |
| Phenobarbital                | [123] | NS | tr |
| Phenytoin                    | [123] | NS | tr |
| Salinomycin                  | [124] | NS | tr |
| Saquinavir                   | [120] | NS | tr |
| Sitosterol                   | [125] | NS | tr |
| SN-343                       | [60]  | NS | tr |
| Valporic acid                | [123] | NS | tr |
| Verapamil                    | [19]  | NS | tr |
| Vinblastine                  | [19]  | NS | tr |
| Vitamin B12 (Cyanocobalamin) | [59]  | NS | tr |
| Vitamin B6 (Pyridoxine)      | [59]  | NS | tr |
| Vitamin C (Ascorbic acid)    | [59]  | NS | tr |
| Vitamin K1 (Phylloquinone)   | [59]  | NS | tr |
| 5-Fluorouracil               | [116] | S  | tr |
| Actinomycin D                | [35]  | S  | tr |
| Ara-C                        | [126] | S  | tr |
| C1212                        | [23]  | S  | tr |
| C1375                        | [23]  | S  | tr |
| Cefadroxil                   | [127] | S  | tr |
| Cidofovir                    | [128] | S  | tr |
| Fenbendazole                 | [79]  | S  | tr |
| Lamotrigine                  | [123] | S  | tr |

|                       |       |    |    |
|-----------------------|-------|----|----|
| Leucovorin            | [71]  | S  | tr |
| LY294002              | [129] | S  | tr |
| Metoprine             | [116] | S  | tr |
| Midazolam             | [130] | S  | tr |
| m-THPC                | [26]  | S  | tr |
| Paclitaxel            | [19]  | S  | tr |
| Prodigiosin           | [131] | S  | tr |
| Rhodamine 123         | [21]  | S  | tr |
| S39625                | [132] | S  | tr |
| SN-22                 | [60]  | S  | tr |
| SN-348                | [60]  | S  | tr |
| SN-351                | [60]  | S  | tr |
| SN-353                | [60]  | S  | tr |
| SN-397                | [60]  | S  | tr |
| SN-443                | [60]  | S  | tr |
| SN-444                | [60]  | S  | tr |
| (99m)Tc-Sestamibi     | [113] | NS | te |
| C1213                 | [23]  | NS | te |
| C1266                 | [23]  | NS | te |
| Corticosterone        | [69]  | NS | te |
| Cortisol              | [34]  | NS | te |
| Daunorubicin          | [21]  | NS | te |
| Primidone             | [123] | NS | te |
| SN-352                | [60]  | NS | te |
| Tacrolimus            | [118] | NS | te |
| Vitamin A (Retinol)   | [59]  | NS | te |
| Vitamin B1 (Thiamine) | [59]  | NS | te |
| Albendazole           | [79]  | S  | te |
| Amonafide L-malate    | [133] | S  | te |
| Amprenavir            | [120] | S  | te |
| C1176                 | [23]  | S  | te |
| C1503                 | [23]  | S  | te |
| C1558                 | [23]  | S  | te |
| Carbamazepine         | [123] | S  | te |
| Clonazepam            | [123] | S  | te |
| LysoTrackerGreen      | [21]  | S  | te |
| mmBPU                 | [115] | S  | te |
| Adefovir              | [128] | NS | e  |
| Buprenorphine         | [122] | NS | e  |
| Colchicine            | [35]  | NS | e  |
| Ethosuximide          | [123] | NS | e  |
| OH-bupropion          | [68]  | NS | e  |
| Propranolol           | [95]  | NS | e  |
| Ritonavir             | [120] | NS | e  |
| Sirolimus             | [118] | NS | e  |

|                                  |       |    |   |
|----------------------------------|-------|----|---|
| Vincristine                      | [134] | NS | e |
| Vitamin E (Tocophenol)           | [59]  | NS | e |
| C1415                            | [23]  | S  | e |
| Dimethyl benzoylphenylurea (BPU) | [115] | S  | e |
| Nutlin-3a                        | [135] | S  | e |
| SN-349                           | [60]  | S  | e |
| YM155                            | [136] | S  | e |

**Abbreviations:** **tr** indicates the compounds in the training set used in the selected model of this study. **te** indicates the compounds in the test set used in the selected model. **e** indicates the compounds in the external validation set used in the selected model. **S** and **NS** denote substrates and non-substrates of wild-type BCRP, respectively. The compounds in the external validation set are highlighted with blue shade.

## References

1. van Herwaarden AE, Wagenaar E, Karnekamp B, Merino G, Jonker JW, Schinkel AH: **Breast cancer resistance protein (Bcrp1/Abcg2) reduces systemic exposure of the dietary carcinogens aflatoxin B1, IQ and Trp-P-1 but also mediates their secretion into breast milk.** *Carcinogenesis* 2006, **27**(1):123-130.
2. de Wolf C, Jansen R, Yamaguchi H, de Haas M, van de Wetering K, Wijnholds J, Beijnen J, Borst P: **Contribution of the drug transporter ABCG2 (breast cancer resistance protein) to resistance against anticancer nucleosides.** *Mol Cancer Ther* 2008, **7**(9):3092-3102.
3. Takenaka K, Morgan JA, Scheffer GL, Adachi M, Stewart CF, Sun D, Leggas M, Ejendal KF, Hrycyna CA, Schuetz JD: **Substrate overlap between Mrp4 and Abcg2/Bcrp affects purine analogue drug cytotoxicity and tissue distribution.** *Cancer Res* 2007, **67**(14):6965-6972.
4. Farrell TL, Poquet L, Dew TP, Barber S, Williamson G: **Predicting phenolic acid absorption in Caco-2 cells: a theoretical permeability model and mechanistic study.** *Drug Metab Dispos* 2012, **40**(2):397-406.
5. Suzuki M, Suzuki H, Sugimoto Y, Sugiyama Y: **ABCG2 transports sulfated conjugates of steroids and xenobiotics.** *J Biol Chem* 2003, **278**(25):22644-22649.
6. Nakatomi K, Yoshikawa M, Oka M, Ikegami Y, Hayasaka S, Sano K, Shiozawa K, Kawabata S, Soda H, Ishikawa T *et al*: **Transport of 7-ethyl-10-hydroxycamptothecin (SN-38) by breast cancer resistance protein ABCG2 in human lung cancer cells.** *Biochem Biophys Res Commun* 2001, **288**(4):827-832.
7. Breedveld P, Pluim D, Cipriani G, Dahlhaus F, van Eijndhoven MA, de Wolf CJ, Kuil A, Beijnen JH, Scheffer GL, Jansen G *et al*: **The effect of low pH on breast**

- cancer resistance protein (ABCG2)-mediated transport of methotrexate, 7-hydroxymethotrexate, methotrexate diglutamate, folic acid, mitoxantrone, topotecan, and resveratrol in in vitro drug transport models.** *Mol Pharmacol* 2007, **71**(1):240-249.
8. Rajendra R, Gounder MK, Saleem A, Schellens JH, Ross DD, Bates SE, Sinko P, Rubin EH: **Differential effects of the breast cancer resistance protein on the cellular accumulation and cytotoxicity of 9-aminocamptothecin and 9-nitrocamptothecin.** *Cancer Res* 2003, **63**(12):3228-3233.
  9. Kis E, Nagy T, Jani M, Molnar E, Janossy J, Ujhellyi O, Nemet K, Heredi-Szabo K, Krajcsi P: **Leflunomide and its metabolite A771726 are high affinity substrates of BCRP: implications for drug resistance.** *Ann Rheum Dis* 2009, **68**(7):1201-1207.
  10. Zamek-Gliszczynski MJ, Nezasa K, Tian X, Kalvass JC, Patel NJ, Raub TJ, Brouwer KL: **The important role of Bcrp (Abcg2) in the biliary excretion of sulfate and glucuronide metabolites of acetaminophen, 4-methylumbelliferone, and harmol in mice.** *Mol Pharmacol* 2006, **70**(6):2127-2133.
  11. Gunness P, Aleksa K, Koren G: **Acyclovir is a substrate for the human breast cancer resistance protein (BCRP/ABCG2): implications for renal tubular transport and acyclovir-induced nephrotoxicity.** *Can J Physiol Pharmacol* 2011, **89**(9):675-680.
  12. Poller B, Iusuf D, Sparidans RW, Wagenaar E, Beijnen JH, Schinkel AH: **Differential impact of P-glycoprotein (ABCB1) and breast cancer resistance protein (ABCG2) on axitinib brain accumulation and oral plasma pharmacokinetics.** *Drug Metab Dispos* 2011, **39**(5):729-735.
  13. Shukla S, Robey RW, Bates SE, Ambudkar SV: **The calcium channel blockers, 1,4-dihydropyridines, are substrates of the multidrug resistance-linked ABC drug transporter, ABCG2.** *Biochemistry* 2006, **45**(29):8940-8951.
  14. Wang X, Furukawa T, Nitanda T, Okamoto M, Sugimoto Y, Akiyama S, Baba M: **Breast cancer resistance protein (BCRP/ABCG2) induces cellular resistance to HIV-1 nucleoside reverse transcriptase inhibitors.** *Mol Pharmacol* 2003, **63**(1):65-72.
  15. Wang X, Nitanda T, Shi M, Okamoto M, Furukawa T, Sugimoto Y, Akiyama S, Baba M: **Induction of cellular resistance to nucleoside reverse transcriptase inhibitors by the wild-type breast cancer resistance protein.** *Biochem Pharmacol* 2004, **68**(7):1363-1370.
  16. Robey RW, Obrzut T, Shukla S, Polgar O, Macalou S, Bahr JC, Di Pietro A, Ambudkar SV, Bates SE: **Becatecarin (rebeccamycin analog, NSC 655649) is a transport substrate and induces expression of the ATP-binding cassette transporter, ABCG2, in lung carcinoma cells.** *Cancer Chemother Pharmacol* 2009, **64**(3):575-583.
  17. Colabufo NA, Pagliarulo V, Berardi F, Contino M, Inglese C, Niso M, Ancona P, Albo G, Pagliarulo A, Perrone R: **Bicalutamide failure in prostate cancer treatment: involvement of Multi Drug Resistance proteins.** *Eur J Pharmacol* 2008, **601**(1-3):38-42.



18. An G, Morris ME: **The sulfated conjugate of biochanin A is a substrate of breast cancer resistant protein (ABCG2).** *Biopharm Drug Dispos* 2011, **32**(8):446-457.
19. Litman T, Brangi M, Hudson E, Fetsch P, Abati A, Ross DD, Miyake K, Resau JH, Bates SE: **The multidrug-resistant phenotype associated with overexpression of the new ABC half-transporter, MXR (ABCG2).** *J Cell Sci* 2000, **113** ( Pt 11):2011-2021.
20. Bates SE, Medina-Perez WY, Kohlhagen G, Antony S, Nadjem T, Robey RW, Pommier Y: **ABCG2 mediates differential resistance to SN-38 (7-ethyl-10-hydroxycamptothecin) and homocamptothecins.** *J Pharmacol Exp Ther* 2004, **310**(2):836-842.
21. Robey RW, Honjo Y, Morisaki K, Nadjem TA, Runge S, Risbood M, Poruchynsky MS, Bates SE: **Mutations at amino-acid 482 in the ABCG2 gene affect substrate and antagonist specificity.** *Br J Cancer* 2003, **89**(10):1971-1978.
22. Ebert B, Seidel A, Lampen A: **Identification of BCRP as transporter of benzo[a]pyrene conjugates metabolically formed in Caco-2 cells and its induction by Ah-receptor agonists.** *Carcinogenesis* 2005, **26**(10):1754-1763.
23. Bram EE, Adar Y, Mesika N, Sabisz M, Skladanowski A, Assaraf YG: **Structural determinants of imidazoacridinones facilitating antitumor activity are crucial for substrate recognition by ABCG2.** *Mol Pharmacol* 2009, **75**(5):1149-1159.
24. Erlichman C, Boerner SA, Hallgren CG, Spieker R, Wang XY, James CD, Scheffer GL, Maliepaard M, Ross DD, Bible KC *et al*: **The HER tyrosine kinase inhibitor CI1033 enhances cytotoxicity of 7-ethyl-10-hydroxycamptothecin and topotecan by inhibiting breast cancer resistance protein-mediated drug efflux.** *Cancer Res* 2001, **61**(2):739-748.
25. de Wolf CJ, Yamaguchi H, van der Heijden I, Wielinga PR, Hundscheid SL, Ono N, Scheffer GL, de Haas M, Schuetz JD, Wijnholds J *et al*: **cGMP transport by vesicles from human and mouse erythrocytes.** *FEBS J* 2007, **274**(2):439-450.
26. Robey RW, Steadman K, Polgar O, Bates SE: **ABCG2-mediated transport of photosensitizers: potential impact on photodynamic therapy.** *Cancer Biol Ther* 2005, **4**(2):187-194.
27. Beery E, Rajnai Z, Abonyi T, Makai I, Bansaghi S, Erdo F, Sziraki I, Heredi-Szabo K, Kis E, Jani M *et al*: **ABCG2 modulates chlorothiazide permeability in vitro - characterization of the interaction.** *Drug Metab Pharmacokinet* 2011.
28. Merino G, Alvarez AI, Pulido MM, Molina AJ, Schinkel AH, Prieto JG: **Breast cancer resistance protein (BCRP/ABCG2) transports fluoroquinolone antibiotics and affects their oral availability, pharmacokinetics, and milk secretion.** *Drug Metab Dispos* 2006, **34**(4):690-695.
29. Enokizono J, Kusuhara H, Sugiyama Y: **Effect of breast cancer resistance protein (Bcrp/Abcg2) on the disposition of phytoestrogens.** *Mol Pharmacol* 2007, **72**(4):967-975.
30. Kalgutkar AS, Feng B, Nguyen HT, Frederick KS, Campbell SD, Hatch HL, Bi YA, Kazolias DC, Davidson RE, Mireles RJ *et al*: **Role of transporters in the disposition of the selective phosphodiesterase-4 inhibitor (+)-2-[4-({2-**

- (benzo[1,3]dioxol-5-yloxy)-pyridine-3-carbonyl]-amino}-methyl)-3-fluorophenoxy]-propionic acid in rat and human. *Drug Metab Dispos* 2007, **35**(11):2111-2118.
31. Alvarez AI, Vallejo F, Barrera B, Merino G, Prieto JG, Tomas-Barberan F, Espin JC: **Bioavailability of the glucuronide and sulfate conjugates of genistein and daidzein in breast cancer resistance protein 1 knockout mice.** *Drug Metab Dispos* 2011, **39**(11):2008-2012.
  32. Lagas JS, van Waterschoot RA, van Tilburg VA, Hillebrand MJ, Lankheet N, Rosing H, Beijnen JH, Schinkel AH: **Brain accumulation of dasatinib is restricted by P-glycoprotein (ABCB1) and breast cancer resistance protein (ABCG2) and can be enhanced by elacridar treatment.** *Clin Cancer Res* 2009, **15**(7):2344-2351.
  33. Pulido MM, Molina AJ, Merino G, Mendoza G, Prieto JG, Alvarez AI: **Interaction of enrofloxacin with breast cancer resistance protein (BCRP/ABCG2): influence of flavonoids and role in milk secretion in sheep.** *J Vet Pharmacol Ther* 2006, **29**(4):279-287.
  34. Imai Y, Asada S, Tsukahara S, Ishikawa E, Tsuruo T, Sugimoto Y: **Breast cancer resistance protein exports sulfated estrogens but not free estrogens.** *Mol Pharmacol* 2003, **64**(3):610-618.
  35. Lin X, Skolnik S, Chen X, Wang J: **Attenuation of intestinal absorption by major efflux transporters: quantitative tools and strategies using a Caco-2 model.** *Drug Metab Dispos* 2011, **39**(2):265-274.
  36. Hu W, Liu W: **Side populations of glioblastoma cells are less sensitive to HSV-TK/GCV suicide gene therapy system than the non-side population.** *In Vitro Cell Dev Biol Anim* 2010, **46**(6):497-501.
  37. Imai Y, Tsukahara S, Asada S, Sugimoto Y: **Phytoestrogens/flavonoids reverse breast cancer resistance protein/ABCG2-mediated multidrug resistance.** *Cancer Res* 2004, **64**(12):4346-4352.
  38. Marchetti S, Oostendorp RL, Pluim D, van Eijndhoven M, van Tellingen O, Schinkel AH, Versace R, Beijnen JH, Mazzanti R, Schellens JH: **In vitro transport of gimatecan (7-t-butoxyiminomethylcamptothecin) by breast cancer resistance protein, P-glycoprotein, and multidrug resistance protein 2.** *Mol Cancer Ther* 2007, **6**(12 Pt 1):3307-3313.
  39. Brechbuhl HM, Gould N, Kachadourian R, Riekhof WR, Voelker DR, Day BJ: **Glutathione transport is a unique function of the ATP-binding cassette protein ABCG2.** *J Biol Chem* 2010, **285**(22):16582-16587.
  40. Zhou L, Naraharisetti SB, Wang H, Unadkat JD, Hebert MF, Mao Q: **The breast cancer resistance protein (Bcrp1/Abcg2) limits fetal distribution of glyburide in the pregnant mouse: an Obstetric-Fetal Pharmacology Research Unit Network and University of Washington Specialized Center of Research Study.** *Mol Pharmacol* 2008, **73**(3):949-959.
  41. Shafran A, Ifergan I, Bram E, Jansen G, Kathmann I, Peters GJ, Robey RW, Bates SE, Assaraf YG: **ABCG2 harboring the Gly482 mutation confers high-level resistance to various hydrophilic antifolates.** *Cancer Res* 2005, **65**(18):8414-8422.

42. Scharenberg CW, Harkey MA, Torok-Storb B: **The ABCG2 transporter is an efficient Hoechst 33342 efflux pump and is preferentially expressed by immature human hematopoietic progenitors.** *Blood* 2002, **99**(2):507-512.
43. Burger H, van Tol H, Boersma AW, Brok M, Wiemer EA, Stoter G, Nooter K: **Imatinib mesylate (STI571) is a substrate for the breast cancer resistance protein (BCRP)/ABCG2 drug pump.** *Blood* 2004, **104**(9):2940-2942.
44. Rabindran SK, He H, Singh M, Brown E, Collins KI, Annable T, Greenberger LM: **Reversal of a novel multidrug resistance mechanism in human colon carcinoma cells by fumitremorgin C.** *Cancer Res* 1998, **58**(24):5850-5858.
45. Maliepaard M, van Gastelen MA, Tohgo A, Hausheer FH, van Waardenburg RC, de Jong LA, Pluim D, Beijnen JH, Schellens JH: **Circumvention of breast cancer resistance protein (BCRP)-mediated resistance to camptothecins in vitro using non-substrate drugs or the BCRP inhibitor GF120918.** *Clin Cancer Res* 2001, **7**(4):935-941.
46. Komatani H, Kotani H, Hara Y, Nakagawa R, Matsumoto M, Arakawa H, Nishimura S: **Identification of breast cancer resistant protein/mitoxantrone resistance/placenta-specific, ATP-binding cassette transporter as a transporter of NB-506 and J-107088, topoisomerase I inhibitors with an indolocarbazole structure.** *Cancer Res* 2001, **61**(7):2827-2832.
47. Seamon JA, Rugg CA, Emanuel S, Calcagno AM, Ambudkar SV, Middleton SA, Butler J, Borowski V, Greenberger LM: **Role of the ABCG2 drug transporter in the resistance and oral bioavailability of a potent cyclin-dependent kinase/Aurora kinase inhibitor.** *Mol Cancer Ther* 2006, **5**(10):2459-2467.
48. An G, Gallegos J, Morris ME: **The bioflavonoid kaempferol is an Abcg2 substrate and inhibits Abcg2-mediated quercetin efflux.** *Drug Metab Dispos* 2011, **39**(3):426-432.
49. Polli JW, Humphreys JE, Harmon KA, Castellino S, O'Mara MJ, Olson KL, John-Williams LS, Koch KM, Serabjit-Singh CJ: **The role of efflux and uptake transporters in [N-{3-chloro-4-[(3-fluorobenzyl)oxy]phenyl}-6-[5-([2-(methylsulfonyl)ethyl]amino )methyl]-2-furyl]-4-quinazolinamine (GW572016, lapatinib) disposition and drug interactions.** *Drug Metab Dispos* 2008, **36**(4):695-701.
50. Enokizono J, Kusuhara H, Ose A, Schinkel AH, Sugiyama Y: **Quantitative investigation of the role of breast cancer resistance protein (Bcrp/Abcg2) in limiting brain and testis penetration of xenobiotic compounds.** *Drug Metab Dispos* 2008, **36**(6):995-1002.
51. Chen Z-S, Robey RW, Belinsky MG, Shchavezleva I, Ren X-Q, Sugimoto Y, Ross DD, Bates SE, Kruh GD: **Transport of Methotrexate, Methotrexate Polyglutamates, and 17{beta}-Estradiol 17-({beta}-D-glucuronide) by ABCG2: Effects of Acquired Mutations at R482 on Methotrexate Transport.** *Cancer Res* 2003, **63**(14):4048-4054.
52. Volk EL, Schneider E: **Wild-type breast cancer resistance protein (BCRP/ABCG2) is a methotrexate polyglutamate transporter.** *Cancer Res* 2003, **63**(17):5538-5543.
53. Tang SC, Lankheet NA, Poller B, Wagenaar E, Beijnen JH, Schinkel AH: **P-Glycoprotein (ABCB1) and Breast Cancer Resistance Protein (ABCG2)**

- Restrict Brain Accumulation of the Active Sunitinib Metabolite N-Desethyl Sunitinib.** *J Pharmacol Exp Ther* 2012, **341**(1):164-173.
54. Deeken JF, Robey RW, Shukla S, Steadman K, Chakraborty AR, Poonkuzhali B, Schuetz EG, Holbeck S, Ambudkar SV, Bates SE: **Identification of compounds that correlate with ABCG2 transporter function in the National Cancer Institute Anticancer Drug Screen.** *Mol Pharmacol* 2009, **76**(5):946-956.
55. Wu CP, Shukla S, Calcagno AM, Hall MD, Gottesman MM, Ambudkar SV: **Evidence for dual mode of action of a thiosemicarbazone, NSC73306: a potent substrate of the multidrug resistance linked ABCG2 transporter.** *Mol Cancer Ther* 2007, **6**(12 Pt 1):3287-3296.
56. Breedveld P, Zelcer N, Pluim D, Sonmezer O, Tibben MM, Beijnen JH, Schinkel AH, van Tellingen O, Borst P, Schellens JH: **Mechanism of the pharmacokinetic interaction between methotrexate and benzimidazoles: potential role for breast cancer resistance protein in clinical drug-drug interactions.** *Cancer Res* 2004, **64**(16):5804-5811.
57. Li L, Sham YY, Bikadi Z, Elmquist WF: **pH-Dependent Transport of Pemetrexed by Breast Cancer Resistance Protein (BCRP).** *Drug Metab Dispos* 2011.
58. van de Wetering K, Burkon A, Feddema W, Bot A, de Jonge H, Somoza V, Borst P: **Intestinal breast cancer resistance protein (BCRP)/Bcrp1 and multidrug resistance protein 3 (MRP3)/Mrp3 are involved in the pharmacokinetics of resveratrol.** *Mol Pharmacol* 2009, **75**(4):876-885.
59. van Herwaarden AE, Wagenaar E, Merino G, Jonker JW, Rosing H, Beijnen JH, Schinkel AH: **Multidrug transporter ABCG2/breast cancer resistance protein secretes riboflavin (vitamin B2) into milk.** *Mol Cell Biol* 2007, **27**(4):1247-1253.
60. Nakagawa H, Saito H, Ikegami Y, Aida-Hyugaji S, Sawada S, Ishikawa T: **Molecular modeling of new camptothecin analogues to circumvent ABCG2-mediated drug resistance in cancer.** *Cancer Lett* 2006, **234**(1):81-89.
61. Lagas JS, van Waterschoot RA, Sparidans RW, Wagenaar E, Beijnen JH, Schinkel AH: **Breast cancer resistance protein and P-glycoprotein limit sorafenib brain accumulation.** *Mol Cancer Ther* 2010, **9**(2):319-326.
62. Urquhart BL, Ware JA, Tirona RG, Ho RH, Leake BF, Schwarz UI, Zaher H, Palandra J, Gregor JC, Dresser GK *et al*: **Breast cancer resistance protein (ABCG2) and drug disposition: intestinal expression, polymorphisms and sulfasalazine as an in vivo probe.** *Pharmacogenet Genomics* 2008, **18**(5):439-448.
63. Mizuno T, Terada T, Kamba T, Fukudo M, Katsura T, Nakamura E, Ogawa O, Inui K: **ABCG2 421C>A polymorphism and high exposure of sunitinib in a patient with renal cell carcinoma.** *Ann Oncol* 2010, **21**(6):1382-1383.
64. Tang SC, Lagas JS, Lankheet NA, Poller B, Hillebrand MJ, Rosing H, Beijnen JH, Schinkel AH: **Brain accumulation of sunitinib is restricted by P-glycoprotein (ABCB1) and breast cancer resistance protein (ABCG2) and can be enhanced by oral elacridar and sunitinib coadministration.** *Int J Cancer* 2012, **130**(1):223-233.

65. Blazquez AG, Briz O, Romero MR, Rosales R, Monte MJ, Vaquero J, Macias RI, Cassio D, Marin JJ: **Characterization of the role of ABCG2 as a bile acid transporter in liver and placenta.** *Mol Pharmacol* 2012, **81**(2):273-283.
66. Woodward OM, Kottgen A, Coresh J, Boerwinkle E, Guggino WB, Kottgen M: **Identification of a urate transporter, ABCG2, with a common functional polymorphism causing gout.** *Proc Natl Acad Sci U S A* 2009, **106**(25):10338-10342.
67. Mittapalli RK, Vaidhyanathan S, Sane R, Elmquist WF: **Impact of P-glycoprotein (ABCB1) and Breast Cancer Resistance Protein (ABCG2) on the Brain Distribution of a novel B-RAF Inhibitor: Vemurafenib (PLX4032).** *J Pharmacol Exp Ther* 2012.
68. Hemauer SJ, Patrikeeva SL, Wang X, Abdelrahman DR, Hankins GD, Ahmed MS, Nanovskaya TN: **Role of transporter-mediated efflux in the placental biodisposition of bupropion and its metabolite, OH-bupropion.** *Biochem Pharmacol* 2010, **80**(7):1080-1086.
69. Pavek P, Merino G, Wagenaar E, Bolscher E, Novotna M, Jonker JW, Schinkel AH: **Human breast cancer resistance protein: interactions with steroid drugs, hormones, the dietary carcinogen 2-amino-1-methyl-6-phenylimidazo(4,5-b)pyridine, and transport of cimetidine.** *J Pharmacol Exp Ther* 2005, **312**(1):144-152.
70. Shen H, Lee FY, Gan J: **Ixabepilone, a Novel Microtubule-Targeting Agent for Breast Cancer, Is a Substrate for P-Glycoprotein (P-gp/MDR1/ABCB1) but not Breast Cancer Resistance Protein (BCRP/ABCG2).** *J Pharmacol Exp Ther* 2011, **337**(2):423-432.
71. Chen ZS, Robey RW, Belinsky MG, Shchavezleva I, Ren XQ, Sugimoto Y, Ross DD, Bates SE, Kruh GD: **Transport of methotrexate, methotrexate polyglutamates, and 17beta-estradiol 17-(beta-D-glucuronide) by ABCG2: effects of acquired mutations at R482 on methotrexate transport.** *Cancer Res* 2003, **63**(14):4048-4054.
72. Perez M, Blazquez AG, Real R, Mendoza G, Prieto JG, Merino G, Alvarez AI: **In vitro and in vivo interaction of moxidectin with BCRP/ABCG2.** *Chem Biol Interact* 2009, **180**(1):106-112.
73. Robey RW, Steadman K, Polgar O, Morisaki K, Blayney M, Mistry P, Bates SE: **Pheophorbide a is a specific probe for ABCG2 function and inhibition.** *Cancer Res* 2004, **64**(4):1242-1246.
74. Robey RW, Fetsch PA, Polgar O, Dean M, Bates SE: **The livestock photosensitizer, phytoporphyrin (phylloerythrin), is a substrate of the ATP-binding cassette transporter ABCG2.** *Res Vet Sci* 2006, **81**(3):345-349.
75. Matsushima S, Maeda K, Kondo C, Hirano M, Sasaki M, Suzuki H, Sugiyama Y: **Identification of the hepatic efflux transporters of organic anions using double-transfected Madin-Darby canine kidney II cells expressing human organic anion-transporting polypeptide 1B1 (OATP1B1)/multidrug resistance-associated protein 2, OATP1B1/multidrug resistance 1, and OATP1B1/breast cancer resistance protein.** *J Pharmacol Exp Ther* 2005, **314**(3):1059-1067.

76. Ohura K, Nozawa T, Murakami K, Imai T: **Evaluation of transport mechanism of prodrugs and parent drugs formed by intracellular metabolism in Caco-2 cells with modified carboxylesterase activity: temocapril as a model case.** *J Pharm Sci* 2011, **100**(9):3985-3994.
77. Pan G, Giri N, Elmquist WF: **Abcg2/Bcrp1 mediates the polarized transport of antiretroviral nucleosides abacavir and zidovudine.** *Drug Metab Dispos* 2007, **35**(7):1165-1173.
78. Giri N, Agarwal S, Shaik N, Pan G, Chen Y, Elmquist WF: **Substrate-dependent breast cancer resistance protein (Bcrp1/Abcg2)-mediated interactions: consideration of multiple binding sites in in vitro assay design.** *Drug Metab Dispos* 2009, **37**(3):560-570.
79. Merino G, Jonker JW, Wagenaar E, Pulido MM, Molina AJ, Alvarez AI, Schinkel AH: **Transport of anthelmintic benzimidazole drugs by breast cancer resistance protein (BCRP/ABCG2).** *Drug Metab Dispos* 2005, **33**(5):614-618.
80. Keskitalo JE, Zolk O, Fromm MF, Kurkinen KJ, Neuvonen PJ, Niemi M: **ABCG2 polymorphism markedly affects the pharmacokinetics of atorvastatin and rosuvastatin.** *Clin Pharmacol Ther* 2009, **86**(2):197-203.
81. Li H, Jin HE, Kim W, Han YH, Kim DD, Chung SJ, Shim CK: **Involvement of P-glycoprotein, multidrug resistance protein 2 and breast cancer resistance protein in the transport of belotecan and topotecan in Caco-2 and MDCKII cells.** *Pharm Res* 2008, **25**(11):2601-2612.
82. Shukla S, Skoumbourdis AP, Walsh MJ, Hartz AM, Fung KL, Wu CP, Gottesman MM, Bauer B, Thomas CJ, Ambudkar SV: **Synthesis and characterization of a BODIPY conjugate of the BCR-ABL kinase inhibitor Tasigna (nilotinib): evidence for transport of Tasigna and its fluorescent derivative by ABC drug transporters.** *Mol Pharm* 2011, **8**(4):1292-1302.
83. Wang T, Agarwal S, Elmquist WF: **Brain Distribution of Cediranib Is Limited by Active Efflux at the BBB.** *J Pharmacol Exp Ther* 2012.
84. Zhang Y, Bressler JP, Neal J, Lal B, Bhang HE, Laterra J, Pomper MG: **ABCG2/BCRP expression modulates D-Luciferin based bioluminescence imaging.** *Cancer Res* 2007, **67**(19):9389-9397.
85. Mizuno N, Takahashi T, Kusuhara H, Schuetz JD, Niwa T, Sugiyama Y: **Evaluation of the role of breast cancer resistance protein (BCRP/ABCG2) and multidrug resistance-associated protein 4 (MRP4/ABCC4) in the urinary excretion of sulfate and glucuronide metabolites of edaravone (MCI-186; 3-methyl-1-phenyl-2-pyrazolin-5-one).** *Drug Metab Dispos* 2007, **35**(11):2045-2052.
86. Li J, Cusatis G, Brahmer J, Sparreboom A, Robey RW, Bates SE, Hidalgo M, Baker SD: **Association of variant ABCG2 and the pharmacokinetics of epidermal growth factor receptor tyrosine kinase inhibitors in cancer patients.** *Cancer Biol Ther* 2007, **6**(3):432-438.
87. Ando T, Kusuhara H, Merino G, Alvarez AI, Schinkel AH, Sugiyama Y: **Involvement of breast cancer resistance protein (ABCG2) in the biliary excretion mechanism of fluoroquinolones.** *Drug Metab Dispos* 2007, **35**(10):1873-1879.

88. Polli JW, Baughman TM, Humphreys JE, Jordan KH, Mote AL, Webster LO, Barnaby RJ, Vitulli G, Bertolotti L, Read KD *et al*: **The systemic exposure of an N-methyl-D-aspartate receptor antagonist is limited in mice by the P-glycoprotein and breast cancer resistance protein efflux transporters.** *Drug Metab Dispos* 2004, **32**(7):722-726.
89. Kondo C, Onuki R, Kusuhara H, Suzuki H, Suzuki M, Okudaira N, Kojima M, Ishiwata K, Jonker JW, Sugiyama Y: **Lack of improvement of oral absorption of ME3277 by prodrug formation is ascribed to the intestinal efflux mediated by breast cancer resistant protein (BCRP/ABCG2).** *Pharm Res* 2005, **22**(4):613-618.
90. Merino G, Jonker JW, Wagenaar E, van Herwaarden AE, Schinkel AH: **The breast cancer resistance protein (BCRP/ABCG2) affects pharmacokinetics, hepatobiliary excretion, and milk secretion of the antibiotic nitrofurantoin.** *Mol Pharmacol* 2005, **67**(5):1758-1764.
91. Yamada A, Maeda K, Kamiyama E, Sugiyama D, Kondo T, Shiroyanagi Y, Nakazawa H, Okano T, Adachi M, Schuetz JD *et al*: **Multiple human isoforms of drug transporters contribute to the hepatic and renal transport of olmesartan, a selective antagonist of the angiotensin II AT1-receptor.** *Drug Metab Dispos* 2007, **35**(12):2166-2176.
92. Shukla S, Wu CP, Nandigama K, Ambudkar SV: **The naphthoquinones, vitamin K3 and its structural analogue plumbagin, are substrates of the multidrug resistance linked ATP binding cassette drug transporter ABCG2.** *Mol Cancer Ther* 2007, **6**(12 Pt 1):3279-3286.
93. Lai Y, Sampson KE, Balogh LM, Brayman TG, Cox SR, Adams WJ, Kumar V, Stevens JC: **Preclinical and clinical evidence for the collaborative transport and renal secretion of an oxazolidinone antibiotic by organic anion transporter 3 (OAT3/SLC22A8) and multidrug and toxin extrusion protein 1 (MATE1/SLC47A1).** *J Pharmacol Exp Ther* 2010, **334**(3):936-944.
94. Jonker JW, Buitelaar M, Wagenaar E, Van Der Valk MA, Scheffer GL, Scheper RJ, Plosch T, Kuipers F, Elferink RP, Rosing H *et al*: **The breast cancer resistance protein protects against a major chlorophyll-derived dietary phototoxin and protoporphyria.** *Proc Natl Acad Sci U S A* 2002, **99**(24):15649-15654.
95. Solbach TF, Paulus B, Weyand M, Eschenhagen T, Zolk O, Fromm MF: **ATP-binding cassette transporters in human heart failure.** *Naunyn Schmiedebergs Arch Pharmacol* 2008, **377**(3):231-243.
96. Yang JJ, Milton MN, Yu S, Liao M, Liu N, Wu JT, Gan L, Balani SK, Lee FW, Prakash S *et al*: **P-glycoprotein and breast cancer resistance protein affect disposition of tandutinib, a tyrosine kinase inhibitor.** *Drug Metab Lett* 2010, **4**(4):201-212.
97. Azzariti A, Porcelli L, Simone GM, Quatrone AE, Colabufo NA, Berardi F, Perrone R, Zucchetti M, D'Incalci M, Xu JM *et al*: **Tyrosine kinase inhibitors and multidrug resistance proteins: interactions and biological consequences.** *Cancer Chemother Pharmacol* 2010, **65**(2):335-346.

98. Goncalves P, Gregorio I, Martel F: **The short-chain fatty acid butyrate is a substrate of breast cancer resistance protein.** *Am J Physiol Cell Physiol* 2011, **301**(5):C984-994.
99. Enokizono J, Kusuhara H, Sugiyama Y: **Involvement of breast cancer resistance protein (BCRP/ABCG2) in the biliary excretion and intestinal efflux of troglitazone sulfate, the major metabolite of troglitazone with a cholestatic effect.** *Drug Metab Dispos* 2007, **35**(2):209-214.
100. van Herwaarden AE, Jonker JW, Wagenaar E, Brinkhuis RF, Schellens JH, Beijnen JH, Schinkel AH: **The breast cancer resistance protein (Bcrp1/Abcg2) restricts exposure to the dietary carcinogen 2-amino-1-methyl-6-phenylimidazo[4,5-b]pyridine.** *Cancer Res* 2003, **63**(19):6447-6452.
101. Jiang W, Xu B, Wu B, Yu R, Hu M: **UDP-glucuronosyltransferase (UGT) 1A9-overexpressing HeLa cells is an appropriate tool to delineate the kinetic interplay between breast cancer resistance protein (BRCP) and UGT and to rapidly identify the glucuronide substrates of BCRP.** *Drug Metab Dispos* 2012, **40**(2):336-345.
102. Tournier N, Valette H, Peyronneau MA, Saba W, Goutal S, Kuhnast B, Dolle F, Scherrmann JM, Cisternino S, Bottlaender M: **Transport of selected PET radiotracers by human P-glycoprotein (ABCB1) and breast cancer resistance protein (ABCG2): an in vitro screening.** *J Nucl Med* 2011, **52**(3):415-423.
103. Feng B, Xu JJ, Bi YA, Mireles R, Davidson R, Duignan DB, Campbell S, Kostrubsky VE, Dunn MC, Smith AR *et al*: **Role of hepatic transporters in the disposition and hepatotoxicity of a HER2 tyrosine kinase inhibitor CP-724,714.** *Toxicol Sci* 2009, **108**(2):492-500.
104. Lagas JS, van der Kruijssen CM, van de Wetering K, Beijnen JH, Schinkel AH: **Transport of diclofenac by breast cancer resistance protein (ABCG2) and stimulation of multidrug resistance protein 2 (ABCC2)-mediated drug transport by diclofenac and benzbromarone.** *Drug Metab Dispos* 2009, **37**(1):129-136.
105. Zhang Y, Gupta A, Wang H, Zhou L, Vethanayagam RR, Unadkat JD, Mao Q: **BCRP transports dipyridamole and is inhibited by calcium channel blockers.** *Pharm Res* 2005, **22**(12):2023-2034.
106. Nakagawa R, Hara Y, Arakawa H, Nishimura S, Komatani H: **ABCG2 confers resistance to indolocarbazole compounds by ATP-dependent transport.** *Biochem Biophys Res Commun* 2002, **299**(4):669-675.
107. Hirano M, Maeda K, Matsushima S, Nozaki Y, Kusuhara H, Sugiyama Y: **Involvement of BCRP (ABCG2) in the biliary excretion of pitavastatin.** *Mol Pharmacol* 2005, **68**(3):800-807.
108. Milane A, Vautier S, Chacun H, Meininger V, Bensimon G, Farinotti R, Fernandez C: **Interactions between riluzole and ABCG2/BCRP transporter.** *Neurosci Lett* 2009, **452**(1):12-16.
109. De Cesare M, Beretta GL, Tinelli S, Benedetti V, Pratesi G, Penco S, Dallavalle S, Merlini L, Pisano C, Carminati P *et al*: **Preclinical efficacy of ST1976, a novel camptothecin analog of the 7-oxyiminomethyl series.** *Biochem Pharmacol* 2007, **73**(5):656-664.



110. Ji Y, Morris ME: **Membrane transport of dietary phenethyl isothiocyanate by ABCG2 (breast cancer resistance protein).** *Mol Pharm* 2005, **2**(5):414-419.
111. Takabe K, Kim RH, Allegood JC, Mitra P, Ramachandran S, Nagahashi M, Harikumar KB, Hait NC, Milstien S, Spiegel S: **Estradiol induces export of sphingosine 1-phosphate from breast cancer cells via ABCC1 and ABCG2.** *J Biol Chem* 2010, **285**(14):10477-10486.
112. Meng F, Cai X, Duan J, Matteucci MG, Hart CP: **A novel class of tubulin inhibitors that exhibit potent antiproliferation and in vitro vessel-disrupting activity.** *Cancer Chemother Pharmacol* 2008, **61**(6):953-963.
113. Chen WS, Luker KE, Dahlheimer JL, Pica CM, Luker GD, Piwnicka-Worms D: **Effects of MDR1 and MDR3 P-glycoproteins, MRP1, and BCRP/MXR/ABCP on the transport of (99m)Tc-tetrofosmin.** *Biochem Pharmacol* 2000, **60**(3):413-426.
114. Miwa M, Tsukahara S, Ishikawa E, Asada S, Imai Y, Sugimoto Y: **Single amino acid substitutions in the transmembrane domains of breast cancer resistance protein (BCRP) alter cross resistance patterns in transfectants.** *Int J Cancer* 2003, **107**(5):757-763.
115. Rudek MA, Zhao M, Smith NF, Robey RW, He P, Hallur G, Khan S, Hidalgo M, Jimeno A, Colevas AD *et al*: **In vitro and in vivo clinical pharmacology of dimethyl benzoylphenylurea, a novel oral tubulin-interactive agent.** *Clin Cancer Res* 2005, **11**(23):8503-8511.
116. Bram E, Ifergan I, Shafran A, Berman B, Jansen G, Assaraf YG: **Mutant Gly482 and Thr482 ABCG2 mediate high-level resistance to lipophilic antifolates.** *Cancer Chemother Pharmacol* 2006, **58**(6):826-834.
117. Chearwae W, Shukla S, Limtrakul P, Ambudkar SV: **Modulation of the function of the multidrug resistance-linked ATP-binding cassette transporter ABCG2 by the cancer chemopreventive agent curcumin.** *Mol Cancer Ther* 2006, **5**(8):1995-2006.
118. Gupta A, Dai Y, Vethanayagam RR, Hebert MF, Thummel KE, Unadkat JD, Ross DD, Mao Q: **Cyclosporin A, tacrolimus and sirolimus are potent inhibitors of the human breast cancer resistance protein (ABCG2) and reverse resistance to mitoxantrone and topotecan.** *Cancer Chemother Pharmacol* 2006, **58**(3):374-383.
119. Huisman MT, Smit JW, Crommentuyn KM, Zelcer N, Wiltshire HR, Beijnen JH, Schinkel AH: **Multidrug resistance protein 2 (MRP2) transports HIV protease inhibitors, and transport can be enhanced by other drugs.** *AIDS* 2002, **16**(17):2295-2301.
120. Gupta A, Zhang Y, Unadkat JD, Mao Q: **HIV protease inhibitors are inhibitors but not substrates of the human breast cancer resistance protein (BCRP/ABCG2).** *J Pharmacol Exp Ther* 2004, **310**(1):334-341.
121. Tep J, Videmann B, Mazallon M, Balleydier S, Cavret S, Lecoer S: **Transepithelial transport of fusariotoxin nivalenol: mediation of secretion by ABC transporters.** *Toxicol Lett* 2007, **170**(3):248-258.
122. Tournier N, Chevillard L, Megarbane B, Pirnay S, Scherrmann JM, Decleves X: **Interaction of drugs of abuse and maintenance treatments with human P-**

- glycoprotein (ABCB1) and breast cancer resistance protein (ABCG2).** *Int J Neuropsychopharmacol* 2009;1-11.
123. Cerveny L, Pavek P, Malakova J, Staud F, Fendrich Z: **Lack of interactions between breast cancer resistance protein (bcrp/abcg2) and selected antiepileptic agents.** *Epilepsia* 2006, **47**(3):461-468.
  124. Lagas JS, Sparidans RW, van Waterschoot RA, Wagenaar E, Beijnen JH, Schinkel AH: **P-glycoprotein limits oral availability, brain penetration, and toxicity of an anionic drug, the antibiotic salinomycin.** *Antimicrob Agents Chemother* 2008, **52**(3):1034-1039.
  125. Albrecht C, Elliott JI, Sardini A, Litman T, Stieger B, Meier PJ, Higgins CF: **Functional analysis of candidate ABC transporter proteins for sitosterol transport.** *Biochim Biophys Acta* 2002, **1567**(1-2):133-142.
  126. Stam RW, van den Heuvel-Eibrink MM, den Boer ML, Ebus ME, Janka-Schaub GE, Allen JD, Pieters R: **Multidrug resistance genes in infant acute lymphoblastic leukemia: Ara-C is not a substrate for the breast cancer resistance protein.** *Leukemia* 2004, **18**(1):78-83.
  127. de Waart DR, van de Wetering K, Kunne C, Duijst S, Paulusma CC, Oude Elferink RP: **Oral availability of cefadroxil depends on ABCC3 and ABCC4.** *Drug Metab Dispos* 2012, **40**(3):515-521.
  128. Imaoka T, Kusuhara H, Adachi M, Schuetz JD, Takeuchi K, Sugiyama Y: **Functional involvement of multidrug resistance-associated protein 4 (MRP4/ABCC4) in the renal elimination of the antiviral drugs adefovir and tenofovir.** *Mol Pharmacol* 2007, **71**(2):619-627.
  129. Imai Y, Yoshimori M, Fukuda K, Yamagishi H, Ueda Y: **The PI3K/Akt inhibitor LY294002 reverses BCRP-mediated drug resistance without affecting BCRP translocation.** *Oncol Rep* 2012, **27**(6):1703-1709.
  130. Franke RM, Lancaster CS, Peer CJ, Gibson AA, Kosloske AM, Orwick SJ, Mathijssen RH, Figg WD, Baker SD, Sparreboom A: **Effect of ABCC2 (MRP2) transport function on erythromycin metabolism.** *Clin Pharmacol Ther* 2011, **89**(5):693-701.
  131. Soto-Cerrato V, Llagostera E, Montaner B, Scheffer GL, Perez-Tomas R: **Mitochondria-mediated apoptosis operating irrespective of multidrug resistance in breast cancer cells by the anticancer agent prodigiosin.** *Biochem Pharmacol* 2004, **68**(7):1345-1352.
  132. Takagi K, Dexheimer TS, Redon C, Sordet O, Agama K, Lavielle G, Pierre A, Bates SE, Pommier Y: **Novel E-ring camptothecin keto analogues (S38809 and S39625) are stable, potent, and selective topoisomerase I inhibitors without being substrates of drug efflux transporters.** *Mol Cancer Ther* 2007, **6**(12 Pt 1):3229-3238.
  133. Burcu M, O'Loughlin KL, Ford LA, Baer MR: **Amonafide L-malate is not a substrate for multidrug resistance proteins in secondary acute myeloid leukemia.** *Leukemia* 2008, **22**(11):2110-2115.
  134. Allen JD, Schinkel AH: **Multidrug resistance and pharmacological protection mediated by the breast cancer resistance protein (BCRP/ABCG2).** *Mol Cancer Ther* 2002, **1**(6):427-434.

135. Zhang F, Throm SL, Murley LL, Miller LA, Steven Zatechka D, Jr., Kiplin Guy R, Kennedy R, Stewart CF: **MDM2 antagonist nutlin-3a reverses mitoxantrone resistance by inhibiting breast cancer resistance protein mediated drug transport.** *Biochem Pharmacol* 2011, **82**(1):24-34.
136. Iwai M, Minematsu T, Li Q, Iwatsubo T, Usui T: **Utility of P-glycoprotein and organic cation transporter 1 double-transfected LLC-PK1 cells for studying the interaction of YM155 monobromide, novel small-molecule survivin suppressant, with P-glycoprotein.** *Drug Metab Dispos* 2011, **39**(12):2314-2320.
